# Supplementary material
Source: PubMed Central journal article supplement (PMC6317328)
Supplement: figure_s1.pdf [file figure_s1.pdf]

# Figure S1

## Stereoscopic Discrimination Behavior

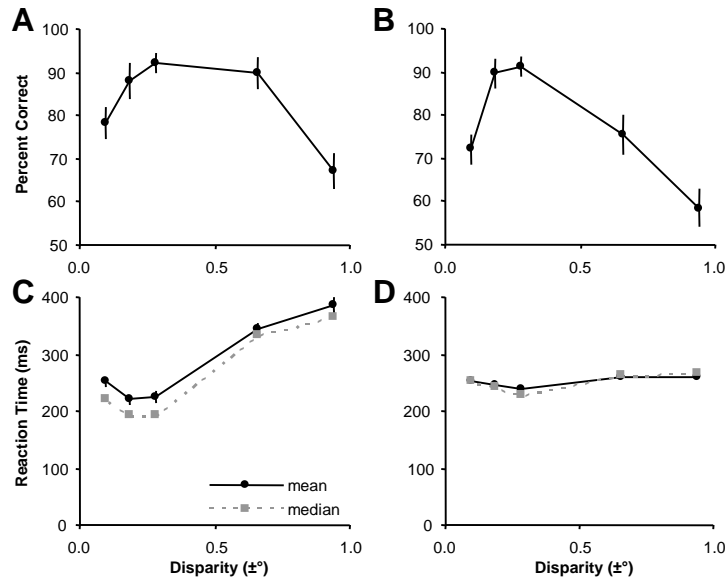

**Figure S1.** Behavioral measurements of two monkeys (left and right;  $n = 100$  and  $120$  trials, respectively) during a two-alternative forced choice disparity discrimination task. Two DRDS were presented with equal, but opposite disparities and the monkey had to saccade to the nearer DRDS. Monkeys were allowed to saccade as soon as they wanted to make a decision. We measured the percent of trials where the correct decision was made (**A** and **B**) and the reaction time until a saccade was made (**C** and **D**). Error bars are standard error with respect to trials.
