# Supplementary material
Source: PubMed Central journal article supplement (PMC6317328)
Supplement: figure_s2.pdf [file figure_s2.pdf]

# Figure S2

## Vergence Behavior

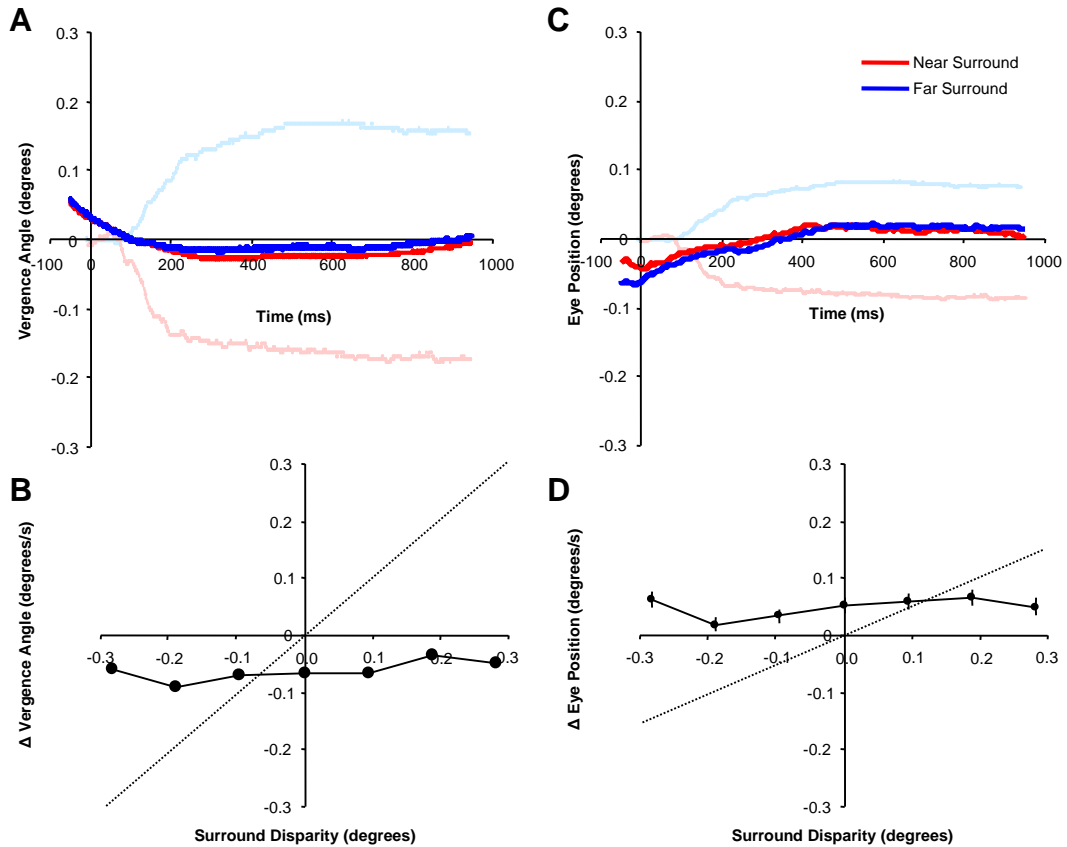

**Figure S2.** Vergence angle measurements during bistable stimulation with unambiguous disparity in the surround. **A**, Average vergence angle of the two eyes over time with respect to the fixation point where positive values mean divergence or both eyes are farther from the nose ( $n = 250$  trials). The light blue and pink lines are estimated vergence from the 2009 position measurements for when a fixation point had  $+0.188$  or  $-0.188$  degree disparity, respectively. **B**, Average rate of change of vergence for different disparities in the surround. Dotted line represents expected rates for fixation point disparities. **C**, Average of single-eye measurements of horizontal position over time with respect to the fixation point where positive values mean farther from the nose ( $n = 160$  trials). The light blue and pink lines are measurements from Samonds et al. (2009) when a fixation point had  $+0.188$  or  $-0.188$  degree disparity, respectively. **D**, Average rate of change of horizontal eye position for different disparities in the surround. Dotted line represents expected rates for fixation point disparities.
